# Supplementary material
Source: Springer Nature journal article supplement (https://www.springermedizin.de/resource/supplementary/40478_2014_122_MOESM4_ESM.pdf/25658200)
Supplement: MOESM4 [file 25658200]

A

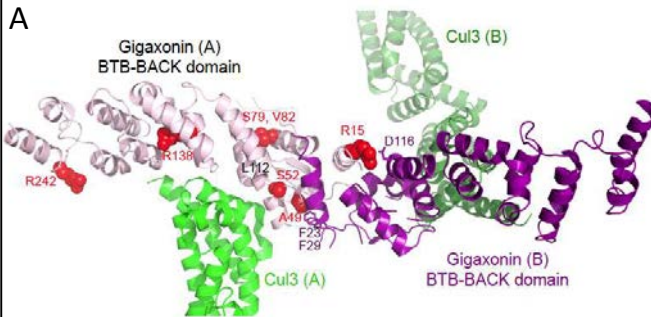

B

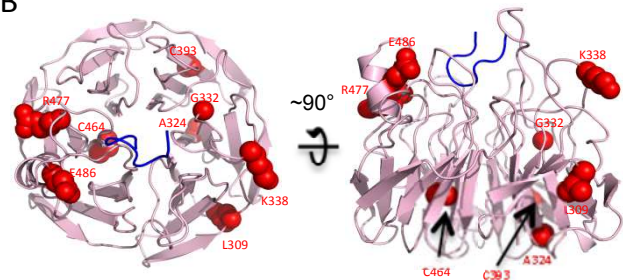

C

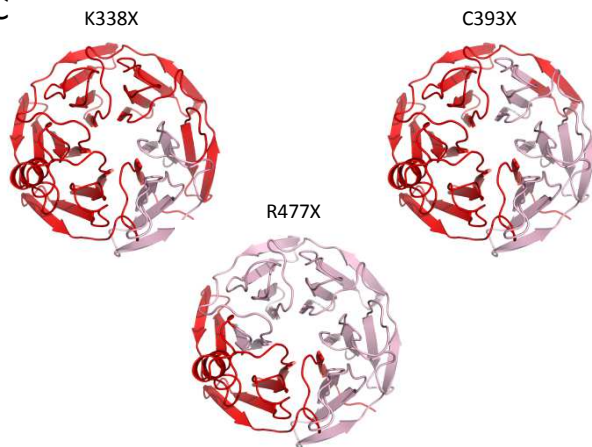

D

| Mutation | Family | R<br>N<br>A | Effect   | Mutation       | Family | R<br>N<br>A | Effect |
|----------|--------|-------------|----------|----------------|--------|-------------|--------|
| R15S     | F2     |             | Homodim. | L309R          | F1     |             | Kelch  |
| A49E     | F26    |             | Homodim. | A324V          | F27    |             | Kelch  |
| S52G     | F11    |             | BTB      | C464Y          | F27    |             | Kelch  |
| C393X    | F11    |             | Kelch    | G332R          | F30    |             | Kelch  |
| S79L/?   | F12    |             | BTB      | K338X          | F18    |             | Kelch  |
| V82F/?   | F6     |             | BTB      | $\Delta$ 6-8   | F18    |             | Kelch  |
| R138H    | F13    |             | Cul3/BTB | R477X          | F16    |             | Kelch  |
| R242X    | F23    |             |          | $\Delta$ 10-11 | F24    |             | Kelch  |
| R269Q    | F15    |             |          | E486K          | F25    |             |        |
|          |        |             |          | $\Delta$ 3-11  | F25    |             | Kelch  |

Destabilization  
 Substrate binding  
 No prediction  
 No mRNA (cf Fig3)
